# Supplementary material for: Carrier Modulation via Tunnel Oxide Passivating at Buried Perovskite Interface for Stable Carbon-Based Solar Cells
Source: MDPI journal article supplement (doi:10.3390/nano13192640), 2023-09-26
Supplement: s1 [file s1]

# Carrier Modulation via Tunnel Oxide Passivating at Buried Perovskite Interface for Stable Carbon-Based Solar Cells

Yuqing Xiao <sup>1,2,\*</sup>, Huijie Zhang <sup>2</sup>, Yue Zhao <sup>3</sup>, Pei Liu <sup>2</sup>, Kiran Kumar Kondamareddy <sup>4</sup> and Changlei Wang <sup>3,\*</sup>

<sup>1</sup> School of Automation, Zhongkai University of Agriculture and Engineering, Guangzhou 510225, China

<sup>2</sup> Key Laboratory of Artificial Micro & Nano Structures of Ministry of Education, School of Physics and Technology, Wuhan University, Wuhan 430072, China; zhanghj@whu.edu.cn (H.Z.); liup@whu.edu.cn (P.L.)

<sup>3</sup> Key Laboratory of Advanced Optical Manufacturing Technologies of Jiangsu Province & Key Laboratory of Modern Optical Technologies of Education Ministry of China, School of Optoelectronic Science and Engineering & Collaborative Innovation Center of Suzhou Nano Science and Technology, Soochow University, Suzhou 215006, China; 20204039003@stu.suda.edu.cn

<sup>4</sup> Department of Physics, School of Pure Sciences, College of Engineering Science and Technology, FIJI National University, Lautoka Campus, Suva 744101, Fiji; kiran.kondamareddy@fnu.ac.fj

\* Correspondence: xiaoyuqing@whu.edu.cn (Y.X.); cl.wang@suda.edu.cn (C.W.)

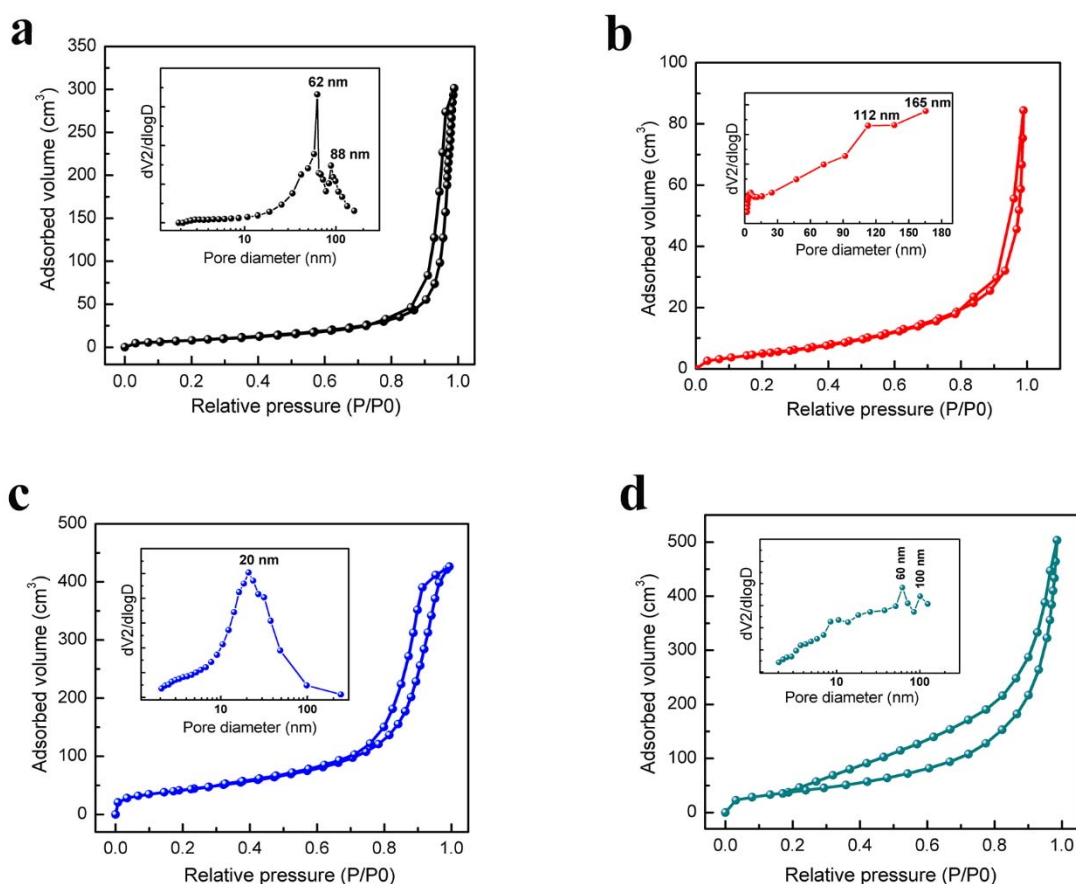

Figure S1. The N<sub>2</sub> adsorption-desorption isotherms and corresponding pore size



distribution curves (inset) of (a)  $\text{TiO}_2$ , (b)  $\text{ZrO}_2$ , (c)  $\text{Al}_2\text{O}_3$ , and (d)  $\text{SiO}_2$ .

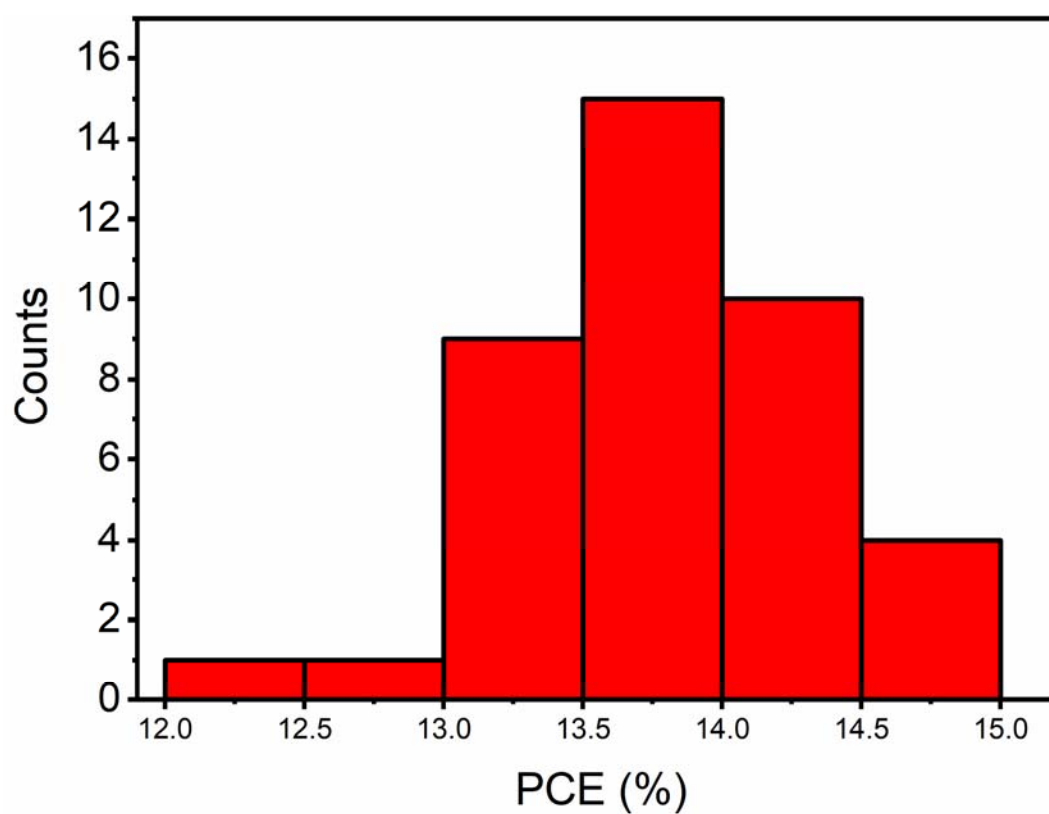

Figure S2. Histograms of solar cell efficiencies were collected from 40 cells with  $\text{ZrO}_2$  TOP.

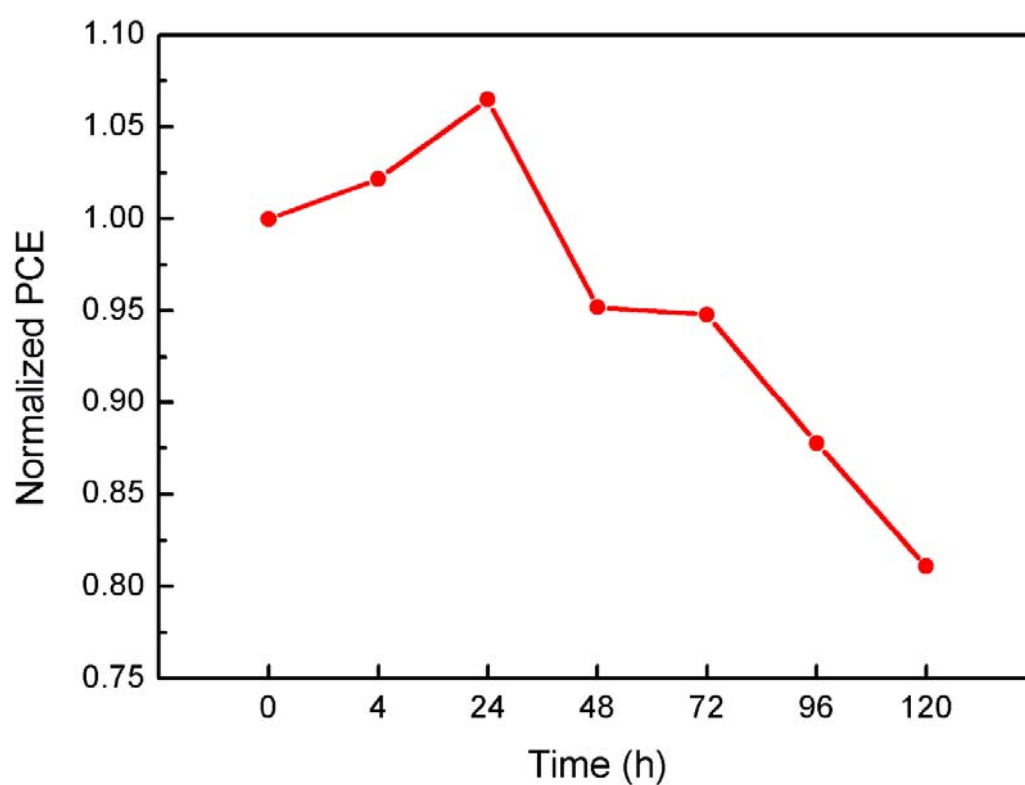

Figure S3. Environmental thermal stress (85 °C in a heating panel) with high humidity (40–60%) conditions.
